# Supplementary material for: Physical activity in psychiatry: Current state and challenges
Source: Atypon-hosted journal article supplement (doi:10.1024/2674-0052/a000069), 2024-02-16
Supplement: 2674-0052_a000069_esm1.pdf [file 2674-0052_a000069_esm1.pdf]

**Electronic Supplementary Material 1**  
**Original Questions of Survey (English Version)**

| <b>Demographic Information</b>                                                                                         |                                                                                                                                                                                                                                                                                                                                                                                                                                                           |
|------------------------------------------------------------------------------------------------------------------------|-----------------------------------------------------------------------------------------------------------------------------------------------------------------------------------------------------------------------------------------------------------------------------------------------------------------------------------------------------------------------------------------------------------------------------------------------------------|
| A) Gender                                                                                                              | <ol style="list-style-type: none"> <li>1. Male</li> <li>2. Female</li> <li>3. Other</li> </ol>                                                                                                                                                                                                                                                                                                                                                            |
| B) Place of residence - continent                                                                                      | <ol style="list-style-type: none"> <li>1. Asia</li> <li>2. Africa</li> <li>3. North America</li> <li>4. South America</li> <li>5. Europe</li> <li>6. Australia/Oceania</li> </ol>                                                                                                                                                                                                                                                                         |
| C) Place of residence - country                                                                                        | [text-answer]                                                                                                                                                                                                                                                                                                                                                                                                                                             |
| D) Completed education                                                                                                 | <ol style="list-style-type: none"> <li>1. Study of medicine</li> <li>2. Study of psychology</li> <li>3. Other study</li> <li>4. Other education</li> <li>5. I am a student.</li> <li>6. I am in education, but I am not studying</li> <li>7. No education</li> </ol>                                                                                                                                                                                      |
| If D = 1:<br>I am a medical specialist in:                                                                             | <ol style="list-style-type: none"> <li>1. Psychiatry</li> <li>2. Psychosomatic medicine</li> <li>3. Neurology</li> <li>4. Child and adolescent psychiatry</li> <li>5. General medicine and/or internal medicine</li> <li>6. Pediatrics and adolescent medicine</li> <li>7. Orthopedics and/or trauma surgery</li> <li>8. Sports psychiatry</li> <li>9. Sports medicine</li> <li>10. Other medical specialty</li> <li>11. No medical specialist</li> </ol> |
| If D = 1:<br>I am currently in medical postgraduate training and/or my medical postgraduate training is not completed: | [yes/no]                                                                                                                                                                                                                                                                                                                                                                                                                                                  |
| E) Place of work                                                                                                       | <ol style="list-style-type: none"> <li>1. University hospital</li> <li>2. Public hospital</li> <li>3. Private hospital</li> <li>4. Institute</li> <li>5. Private practice</li> <li>6. Other place of work</li> </ol>                                                                                                                                                                                                                                      |
| F) Patient care activity                                                                                               | <ol style="list-style-type: none"> <li>1. Outpatient care</li> <li>2. Partial inpatient care</li> <li>3. Inpatient care</li> <li>4. Other patient care activity</li> <li>5. No activity in patient care</li> </ol>                                                                                                                                                                                                                                        |
| G) I am familiar with the discipline sports psychiatry and its fields of activity                                      | <ol style="list-style-type: none"> <li>1. Yes</li> <li>2. No</li> <li>3. Partially</li> </ol>                                                                                                                                                                                                                                                                                                                                                             |

| <b>Physical Activity in Prevention and Treatment</b>                                 |                                                                                                                                                                                                                                                                                                                                                                                                                                                                                                                                                                                                                                                                                                                                                                                                                                                                                                    |
|--------------------------------------------------------------------------------------|----------------------------------------------------------------------------------------------------------------------------------------------------------------------------------------------------------------------------------------------------------------------------------------------------------------------------------------------------------------------------------------------------------------------------------------------------------------------------------------------------------------------------------------------------------------------------------------------------------------------------------------------------------------------------------------------------------------------------------------------------------------------------------------------------------------------------------------------------------------------------------------------------|
| H) Sports and exercise play an important role in the prevention of mental disorders  | <ol style="list-style-type: none"> <li>1. Strongly agree</li> <li>2. Agree</li> <li>3. Neither agree nor disagree</li> <li>4. Disagree</li> <li>5. Strongly disagree.</li> </ol>                                                                                                                                                                                                                                                                                                                                                                                                                                                                                                                                                                                                                                                                                                                   |
| I) Sports and exercise play an important role in the prevention of physical diseases | <ol style="list-style-type: none"> <li>1. Strongly agree</li> <li>2. Agree</li> <li>3. Neither agree nor disagree</li> <li>4. Disagree</li> <li>5. Strongly disagree</li> </ol>                                                                                                                                                                                                                                                                                                                                                                                                                                                                                                                                                                                                                                                                                                                    |
| J) Sports and exercise play an important role in the treatment of mental disorders   | <ol style="list-style-type: none"> <li>1. Strongly agree</li> <li>2. Agree</li> <li>3. Neither agree nor disagree</li> <li>4. Disagree</li> <li>5. Strongly disagree</li> </ol>                                                                                                                                                                                                                                                                                                                                                                                                                                                                                                                                                                                                                                                                                                                    |
| K) Sports and exercise play an important role in the treatment of physical diseases  | <ol style="list-style-type: none"> <li>1. Strongly agree</li> <li>2. Agree</li> <li>3. Neither agree nor disagree</li> <li>4. Disagree</li> <li>5. Strongly disagree</li> </ol>                                                                                                                                                                                                                                                                                                                                                                                                                                                                                                                                                                                                                                                                                                                    |
| L) I use sports and exercise in patient care as a therapeutic                        | <ol style="list-style-type: none"> <li>1. In the prevention of mental disorders</li> <li>2. In the treatment of mental disorders</li> <li>3. In the prevention of physical diseases</li> <li>4. In the treatment of physical diseases</li> <li>5. I do not use sports and exercise as a therapeutic agent in patient care</li> <li>6. I am not involved in patient care</li> </ol>                                                                                                                                                                                                                                                                                                                                                                                                                                                                                                                 |
| M) I use sports and exercise in patient care as a therapeutic for the treatment of   | <ol style="list-style-type: none"> <li>1. Mental health Symptoms and disorders resulting from head injuries.</li> <li>2. Substance use and/or substance use disorders.</li> <li>3. Psychosis and/or delusional disorders.</li> <li>4. Mania and/or bipolar affective disorders.</li> <li>5. Depression.</li> <li>6. Panic and/or anxiety disorders.</li> <li>7. Obsessive-compulsive disorders.</li> <li>8. Post-traumatic stress disorders.</li> <li>9. Adjustment disorders.</li> <li>10. Somatoform pain disorders.</li> <li>11. Disturbed eating behavior and/or eating disorders.</li> <li>12. Sleep disorders.</li> <li>13. Emotionally unstable personality disorders.</li> <li>14. Other personality disorders (non-emotionally unstable personality disorder).</li> <li>15. Gambling and/or other behavioral addictions.</li> <li>16. Attention-deficit/hyperactivity disorder</li> </ol> |

|                                                                                                 |                                                                                                                                                                                                                                                                                                                                                                                                                                                                                                                                                                                                                                                                                                                                                                                      |
|-------------------------------------------------------------------------------------------------|--------------------------------------------------------------------------------------------------------------------------------------------------------------------------------------------------------------------------------------------------------------------------------------------------------------------------------------------------------------------------------------------------------------------------------------------------------------------------------------------------------------------------------------------------------------------------------------------------------------------------------------------------------------------------------------------------------------------------------------------------------------------------------------|
|                                                                                                 | (ADHD).<br>17. Other mental disorders. (if yes: [text])                                                                                                                                                                                                                                                                                                                                                                                                                                                                                                                                                                                                                                                                                                                              |
| <p>N) Difficulties in using sports and exercise as a therapeutic agent in patient care are:</p> | <p>Patients:</p> <ol style="list-style-type: none"> <li>1. Lack of knowledge</li> <li>2. Lack of understanding</li> <li>3. Lack of motivation</li> <li>4. Lack of social support</li> </ol> <p>Clinic/Institution:</p> <ol style="list-style-type: none"> <li>1. Lack of knowledge</li> <li>2. Lack of understanding</li> <li>3. Missing or insufficient offer</li> <li>4. Lack of infrastructure</li> </ol> <p>Practice:</p> <ol style="list-style-type: none"> <li>1. Missing or insufficient offer</li> <li>2. Lack of infrastructure</li> <li>3. Lack of reimbursement or cost absorption by health insurance companies</li> <li>4. Missing or insufficient prescription possibilities</li> </ol> <p>Other difficulties: [text]</p> <p>No difficulties [checked / unchecked]</p> |
